# Supplementary material for: Optimization of Malachite Green Removal from Water by TiO2 Nanoparticles under UV Irradiation
Source: MDPI journal article supplement (doi:10.3390/nano8060428), 2018-06-13
Supplement: s1 [file s1]

# Optimization of Malachite Green Removal from Water by TiO<sub>2</sub> Nanoparticles under UV Irradiation

Yongmei Ma<sup>1</sup>, Maofei Ni<sup>1,2</sup>, Siyue Li<sup>1\*</sup>

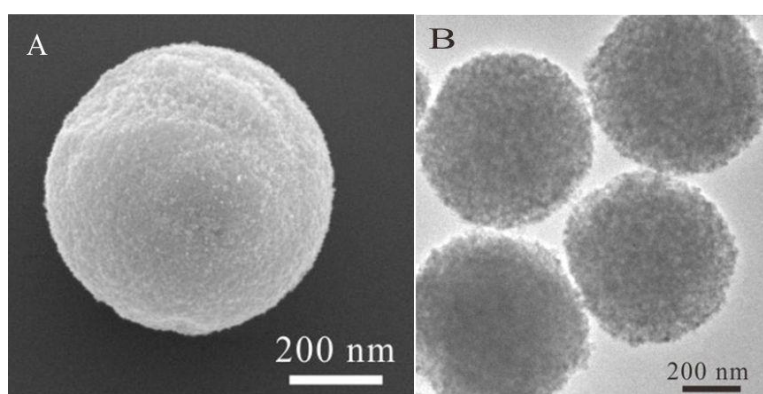

**Figure S1.** SEM and TEM images of TiO<sub>2</sub> particles.

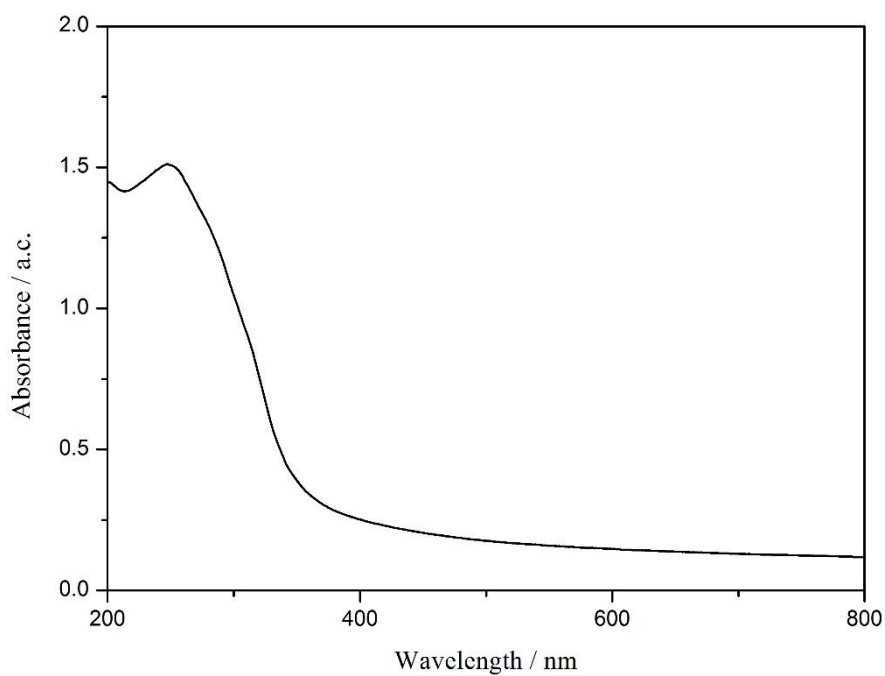

**Figure S2.** The UV-vis spectra of TiO<sub>2</sub>.

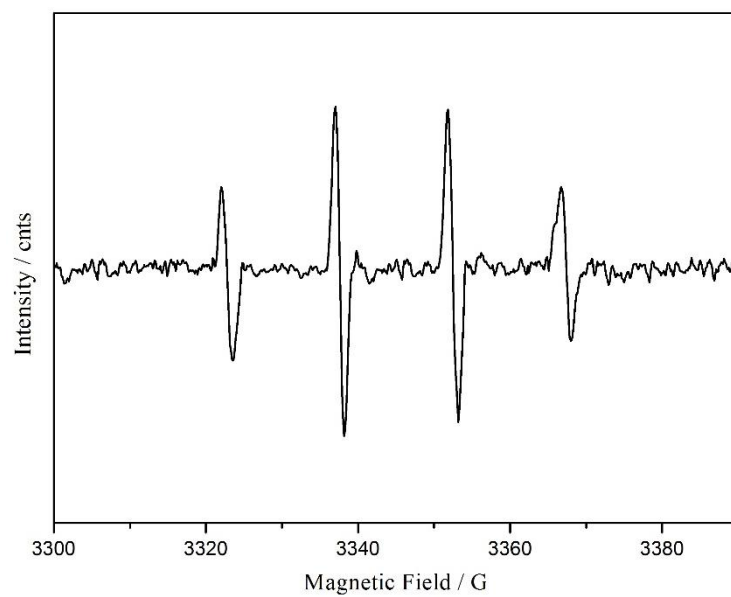

**Figure S3.** ESR spectral features of the DMPO--OH spin adducts in the system without addition of MG under irradiation of UV light with TiO<sub>2</sub>.
